# Supplementary material for: Conservation insights for the Critically Endangered Black Softshell Turtle (Nilssonia nigricans) through integrative ecological and genetic approaches in South Asia
Source: Research Square preprint supplement (doi:10.21203/rs.3.rs-7076544/v1), 2025-07-11
Supplement: Supplementary file 1 [file 56ecb406f8e6ebb1fbb2d624.docx]

**Supplementary Information**

**
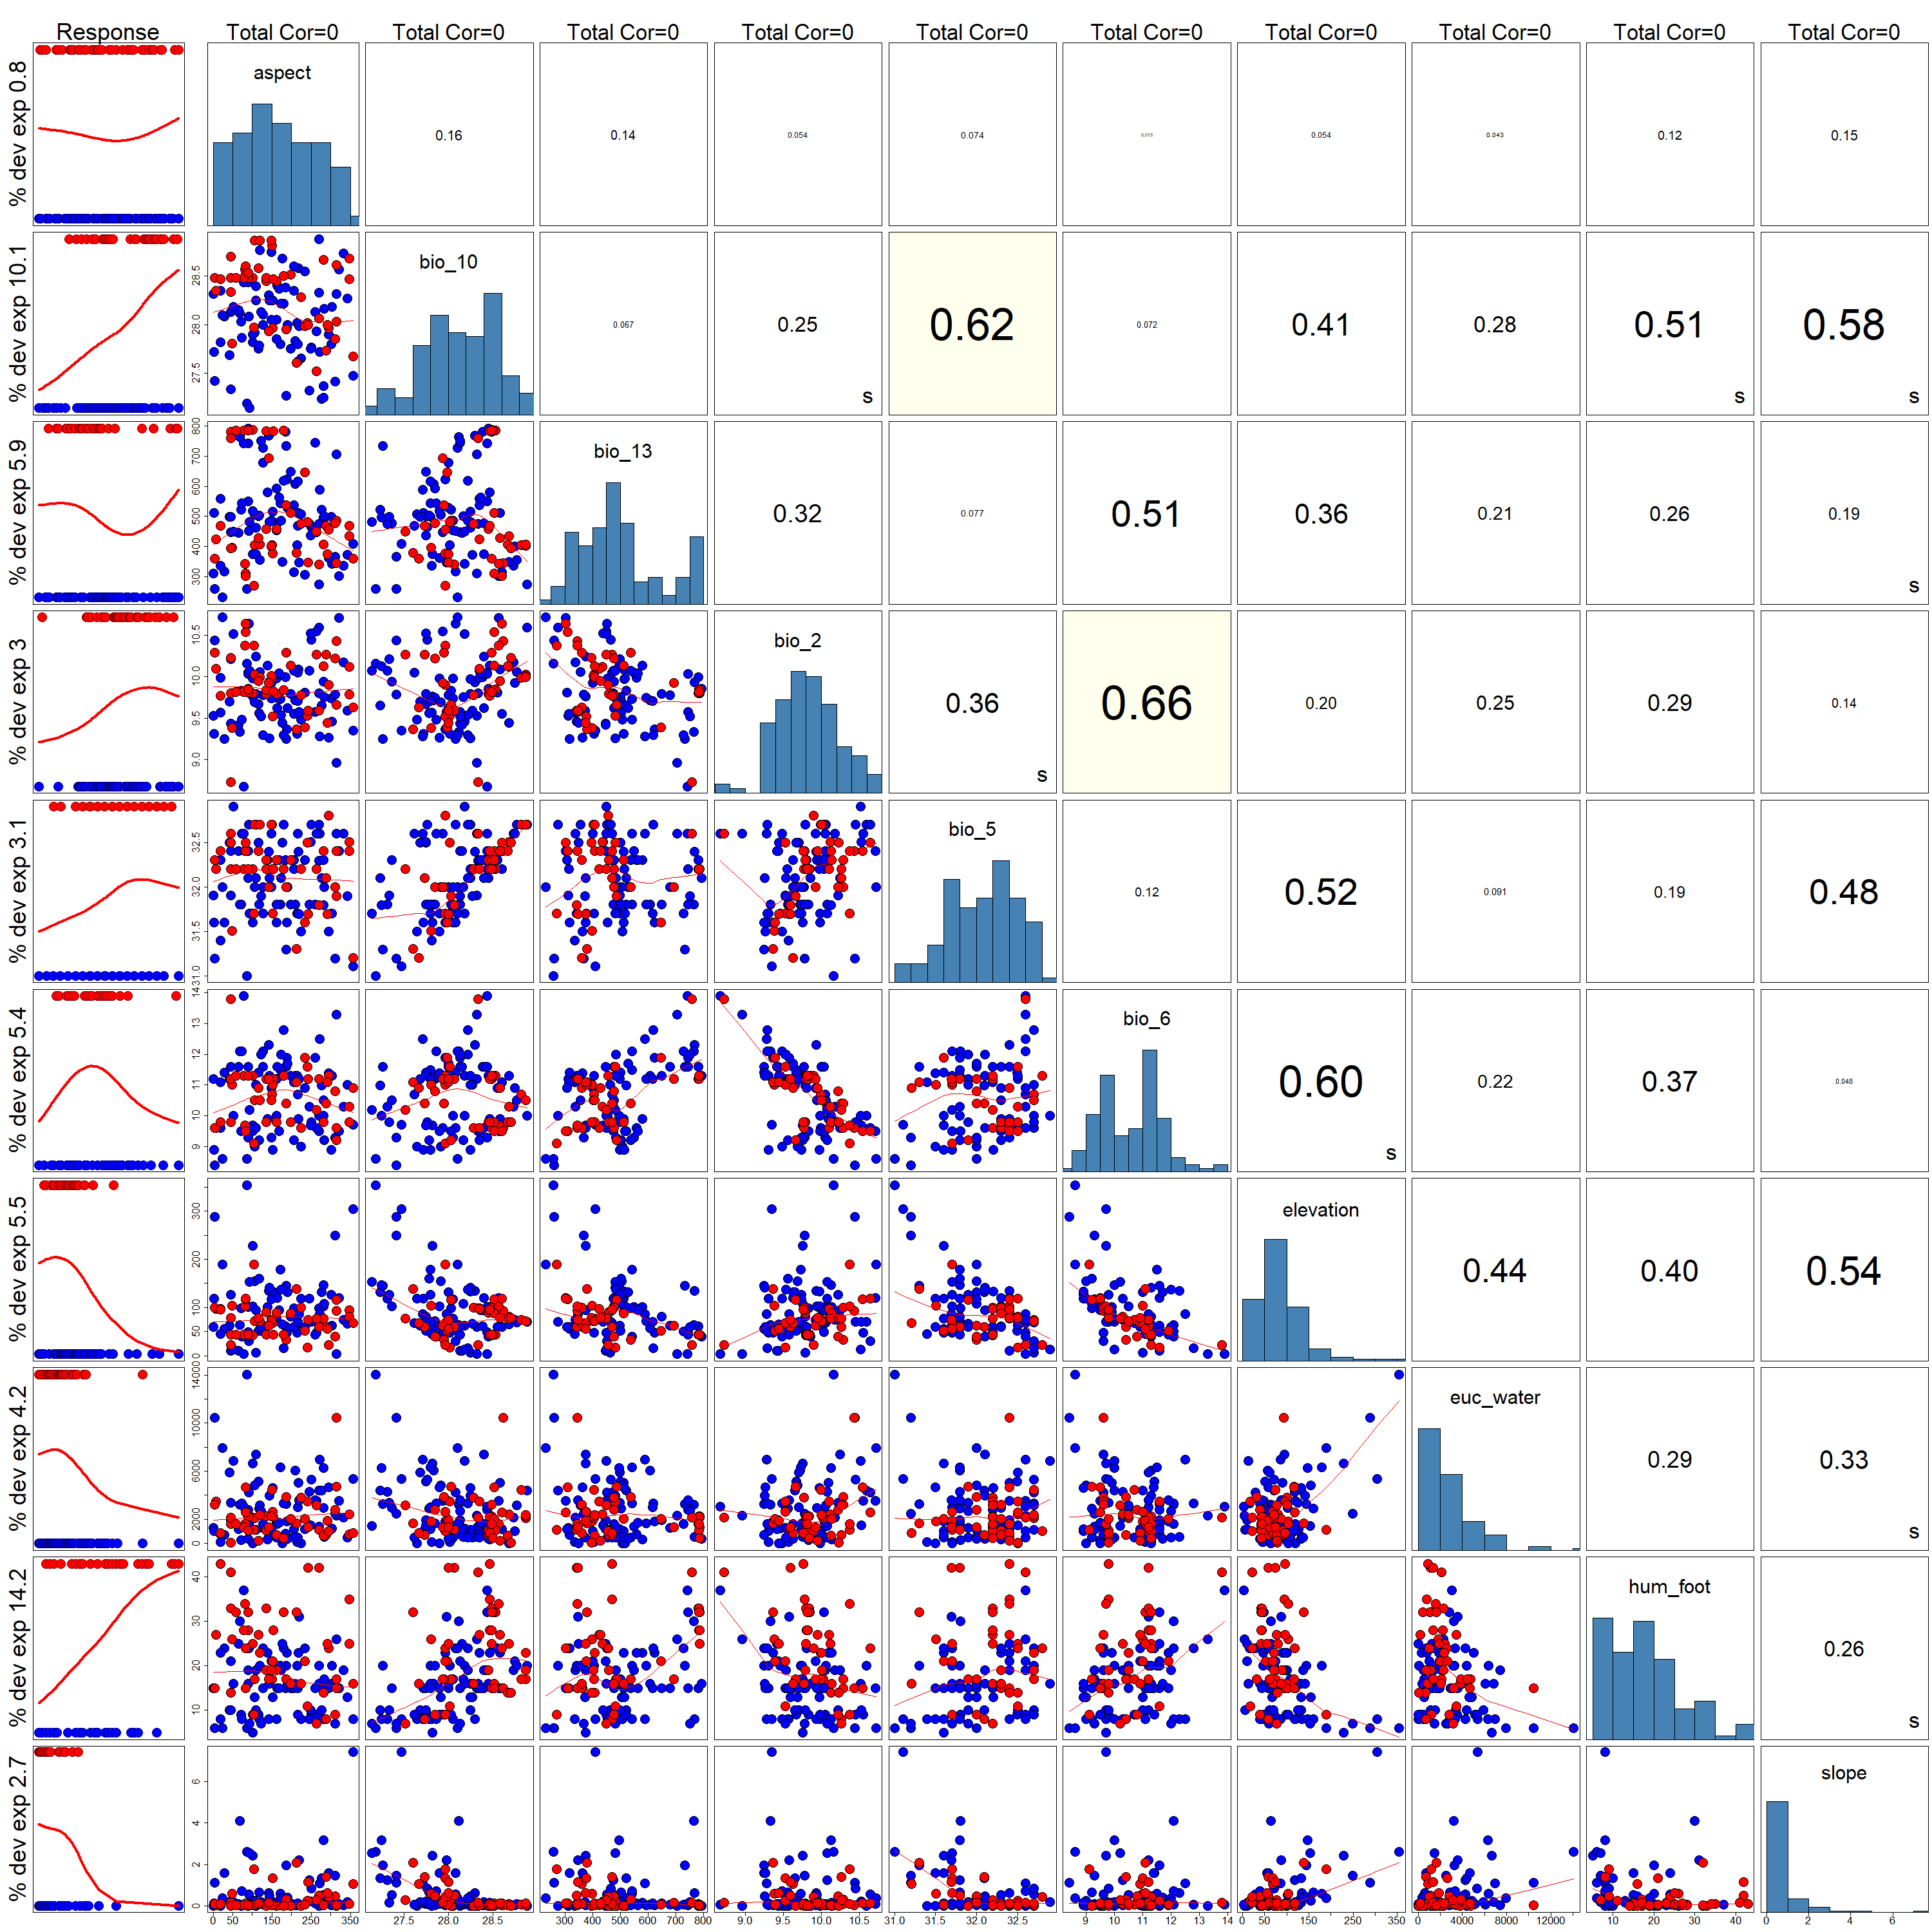
**

**Figure S1.** Figure showing the correlation (<0.7) between the covariates chosen for final model for *N. nigricans*. The Pearson correlation coefficient is the primarily used here. However, if the Spearman or Kendall correlation coefficient exceeds the Pearson correlation coefficient, an "s" or "k" will be displayed in the bottom-right corner of the variable box.


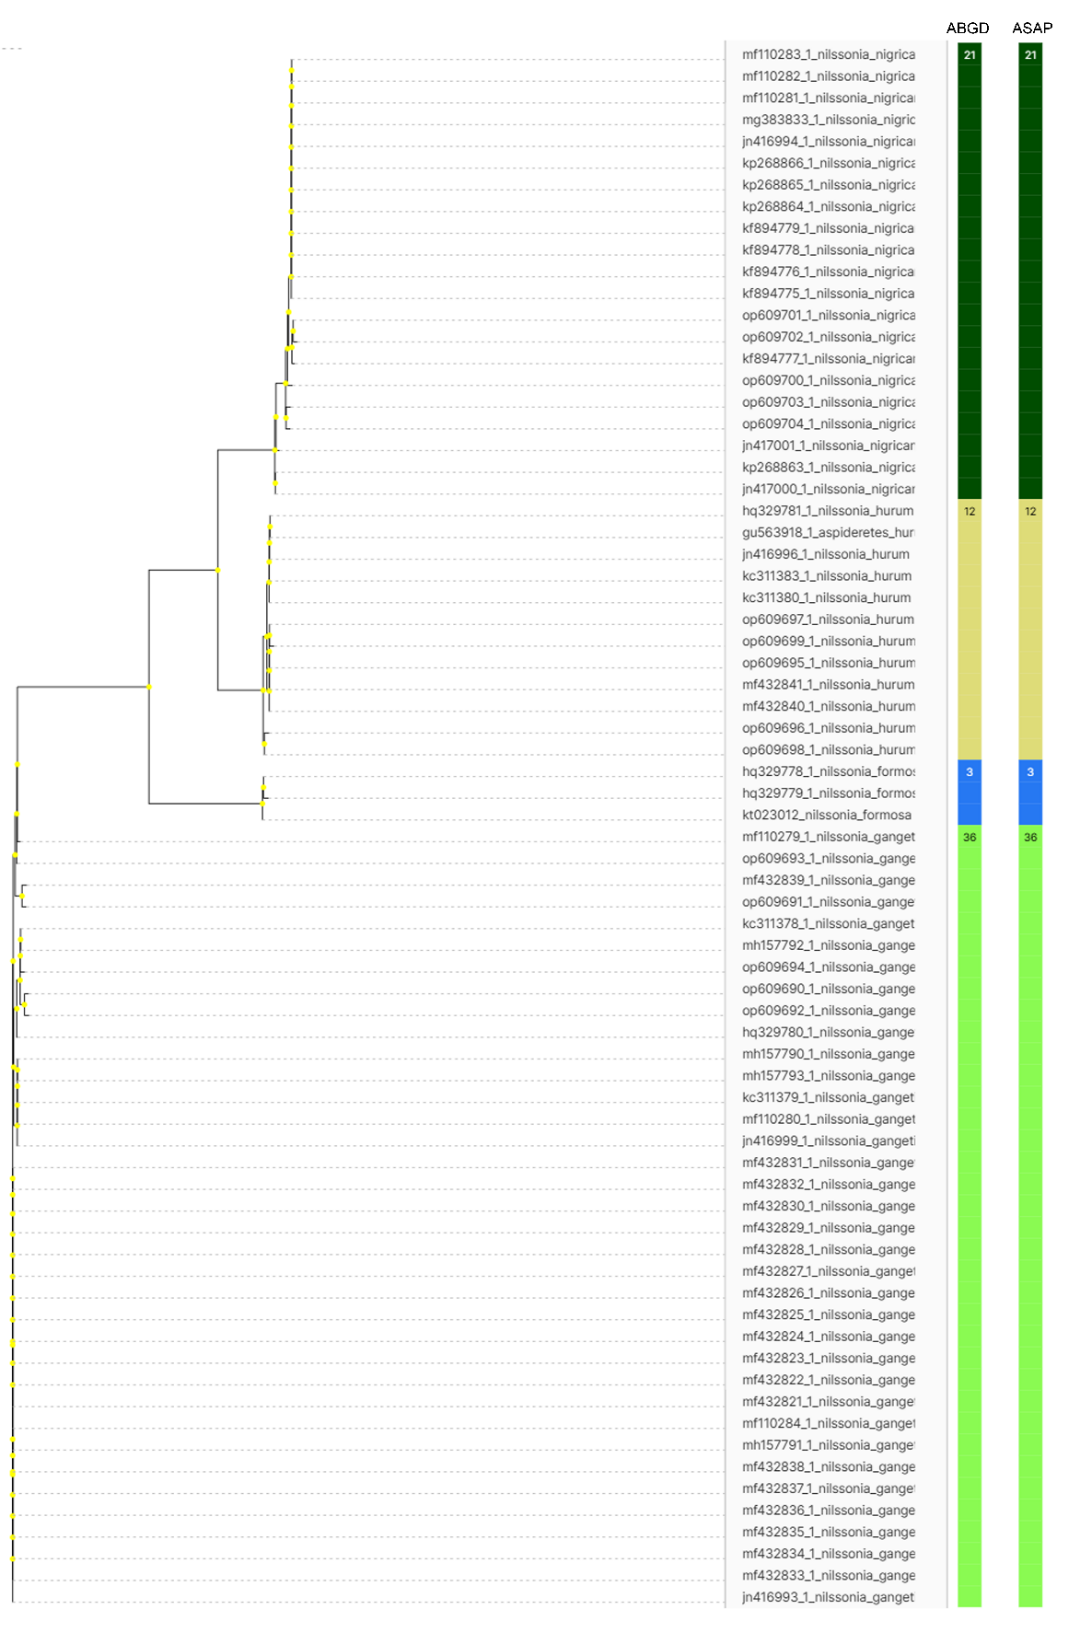


**Figure S2.** Species delimitation results using ABGD and ASAP methods based on the *COI* gene. Color bars represent the estimated Evolutionarily Significant Units (ESUs) corresponding to each species.


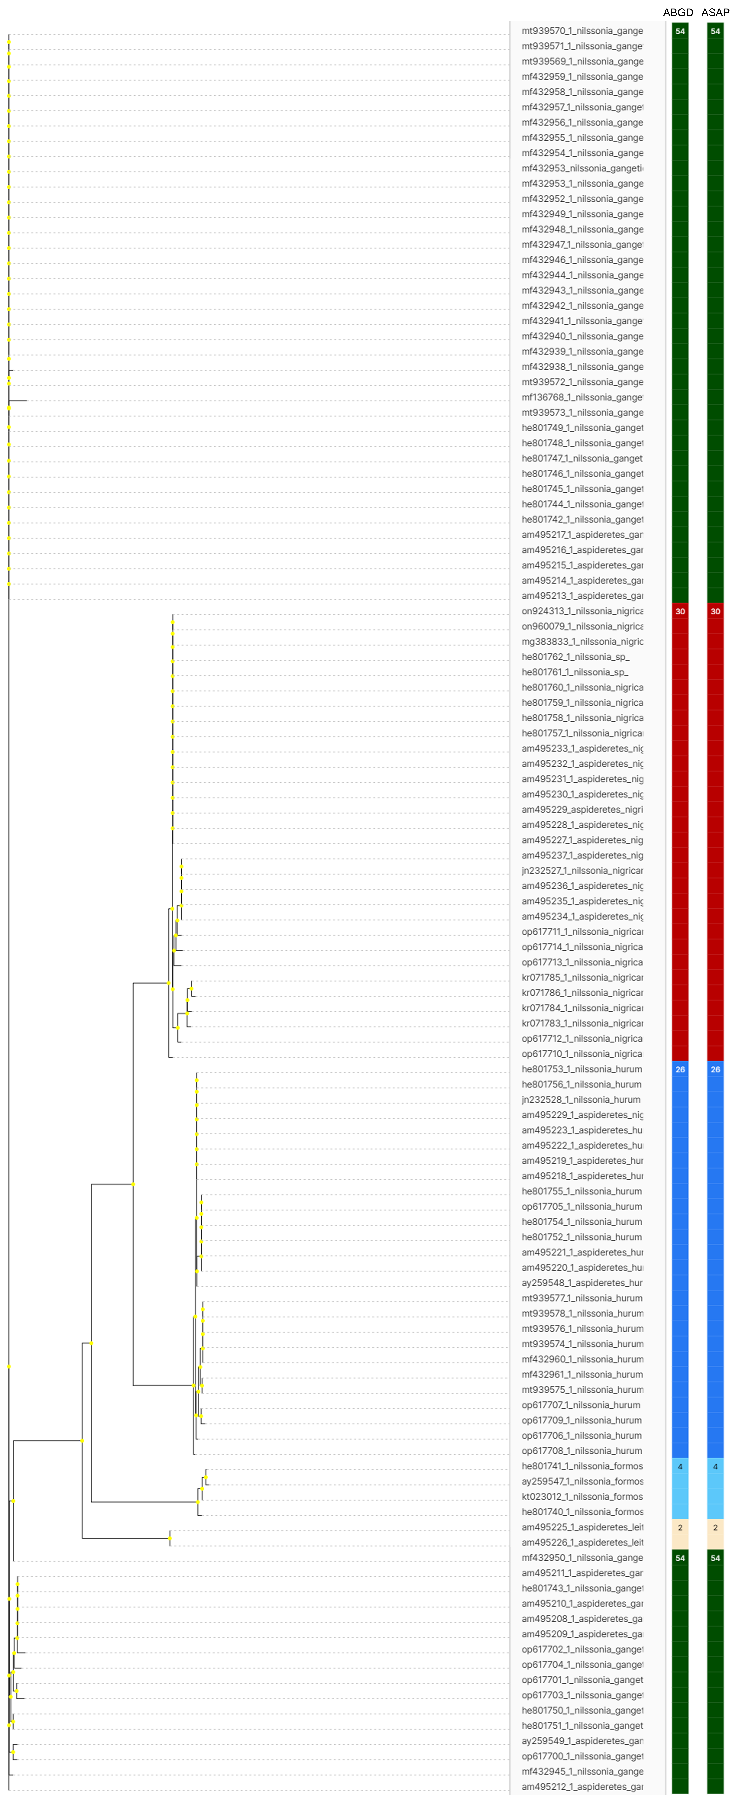


**Figure S3.** Species delimitation results using ABGD and ASAP methods based on the *Cytb* gene. Color bars represent the estimated Evolutionarily Significant Units (ESUs) corresponding to each species.

**Table S1.** Generated (marked by an asterisk) and GenBank-derived *N. nigricans* *COI* and *Cytb* gene sequences along with associated locality information used for genetic analyses in this study.

| ***COI* Accession No.** | **Lat** | **Lon** | **Reference** | ***Cytb* Accession No.** | **Lat** | **Lon** | **Reference** |
| --- | --- | --- | --- | --- | --- | --- | --- |
| OP609700* | 27.574 | 95.393 | This Study | OP617710* | 27.574 | 95.393 | This Study |
| OP609701* | 27.675 | 95.787 | This Study | OP617711* | 27.675 | 95.787 | This Study |
| OP609702* | 26.723 | 92.994 | This Study | OP617712* | 26.723 | 92.994 | This Study |
| OP609703* | 27.574 | 95.393 | This Study | OP617713* | 27.574 | 95.393 | This Study |
| OP609704* | 27.675 | 95.787 | This Study | OP617714* | 27.675 | 95.787 | This Study |
| MG383833 | 27.75 | 95.8 | Kundu et al. 2018a | MG383833 | 27.75 | 95.8 | Kundu et al. 2018 |
| MF110283 | 26.7248 | 92.9944 | Kundu et al. 2018b | KR071786 | 25.67 | 92.95 | Kundu et al. 2015 |
| MF110282 | 26.7248 | 92.9944 | Kundu et al. 2018b | KR071785 | 24.49 | 92.47 | Kundu et al. 2015 |
| MF110281 | 26.7248 | 92.9944 | Kundu et al. 2018b | KR071784 | 23.31 | 91.31 | Kundu et al. 2015 |
| JN417001 | 27.3 | 95.22 | Kundu et al. 2015 | KR071783 | 27.3 | 95.22 | Kundu et al. 2015 |
| JN417000 | 27.3 | 95.22 | Kundu et al. 2015 | HE801760 | 26.538 | 88.721 | Liebing et al. 2012 |
| JN416994 | 23.31 | 91.31 | Kundu et al. 2015 | HE801759 | 26.538 | 88.721 | Liebing et al. 2012 |
| KP268866 | 25.67 | 92.95 | Kundu et al. 2015 | HE801758 | 26.646 | 92.866 | Liebing et al. 2012 |
| KP268865 | 25.67 | 92.95 | Kundu et al. 2015 | HE801757 | 26.646 | 92.866 | Liebing et al. 2012 |
| KP268864 | 25.67 | 92.95 | Kundu et al. 2015 | JN232527 | 26.646 | 92.866 | Unpublished |
| KP268863 | 25.67 | 92.95 | Kundu et al. 2015 | AM495237 | 26.165 | 91.705 | Praschag et al. 2007 |
| KF894779 | 24.51 | 92.21 | Kundu et al. 2015 | AM495236 | 26.165 | 91.705 | Praschag et al. 2007 |
| KF894778 | 24.35 | 92.22 | Kundu et al. 2015 | AM495235 | 26.165 | 91.705 | Praschag et al. 2007 |
| KF894777 | 24.51 | 92.21 | Kundu et al. 2015 | AM495234 | 26.165 | 91.705 | Praschag et al. 2007 |
| KF894776 | 24.49 | 92.47 | Kundu et al. 2015 | AM495233 | 26.646 | 92.866 | Praschag et al. 2007 |
| KF894775 | 24.18 | 92.17 | Kundu et al. 2015 | AM495232 | 22.388 | 91.809 | Praschag et al. 2007 |
|  |  |  |  | AM495231 | 22.388 | 91.809 | Praschag et al. 2007 |
|  |  |  |  | AM495230 | 22.388 | 91.809 | Praschag et al. 2007 |
|  |  |  |  | AM495229 | 22.388 | 91.809 | Praschag et al. 2007 |
|  |  |  |  | AM495228 | 22.388 | 91.809 | Praschag et al. 2007 |
|  |  |  |  | AM495227 | 22.388 | 91.809 | Praschag et al. 2007 |

**Table S2.** Generated (marked by an asterisk) and GenBank-derived *COI* gene sequences of other *Nilssonia* congeners used for genetic analyses in this study.

| **Species** | **Accession No.** | **Species** | **Accession No.** | **Species** | **Accession No.** |
| --- | --- | --- | --- | --- | --- |
| *N. hurum* | OP609699* | *N. gangetica* | MF432835 | *N. gangetica* | MF432837 |
| *N. hurum* | OP609698* | *N. gangetica* | MF432834 | *N. gangetica* | MF432836 |
| *N. hurum* | OP609697* | *N. gangetica* | MF432833 | *N. gangetica* | MF432821 |
| *N. hurum* | OP609696* | *N. gangetica* | MF432832 | *N. gangetica* | MF110284 |
| *N. hurum* | OP609695* | *N. gangetica* | MF432831 | *N. gangetica* | MF110280 |
| *N. hurum* | MF432841 | *N. gangetica* | MF432830 | *N. gangetica* | MF110279 |
| *N. hurum* | MF432840 | *N. gangetica* | MF432829 | *N. gangetica* | JN416999 |
| *N. hurum* | JN416996 | *N. gangetica* | MF432828 | *N. gangetica* | JN416993 |
| *N. hurum* | GU563918 | *N. gangetica* | MF432827 | *N. gangetica* | KC311379 |
| *N. hurum* | KC311383 | *N. gangetica* | MF432826 | *N. gangetica* | KC311378 |
| *N. hurum* | KC311380 | *N. gangetica* | MF432825 | *N. gangetica* | HQ329780 |
| *N. hurum* | HQ329781 | *N. gangetica* | MF432824 | *N. gangetica* | MH157793 |
| *N. gangetica* | OP609694* | *N. gangetica* | MF432823 | *N. gangetica* | MH157792 |
| *N. gangetica* | OP609693* | *N. gangetica* | MF432822 | *N. gangetica* | MH157791 |
| *N. gangetica* | OP609692* | *N. gangetica* | MH157790 | *N. formosa* | KT023012 |
| *N. gangetica* | OP609691* | *N. gangetica* | MF432839 | *N. formosa* | HQ329779 |
| *N. gangetica* | OP609690* | *N. gangetica* | MF432838 | *N. formosa* | HQ329778 |

**Table S3.** Generated (marked by an asterisk) and GenBank-derived *Cytb* gene sequences of other *Nilssonia* congeners used for genetic analyses in this study.

| **Species** | **Accession No.** | **Species** | **Accession No.** | **Species** | **Accession No.** |
| --- | --- | --- | --- | --- | --- |
| *N. hurum* | OP617709* | *N. gangetica* | OP617700* | *N. gangetica* | MT939573 |
| *N. hurum* | OP617708* | *N. gangetica* | MT939571 | *N. gangetica* | HE801751 |
| *N. hurum* | OP617707* | *N. gangetica* | MT939570 | *N. gangetica* | HE801750 |
| *N. hurum* | OP617706* | *N. gangetica* | MT939569 | *N. gangetica* | HE801749 |
| *N. hurum* | OP617705* | *N. gangetica* | MF432959 | *N. gangetica* | HE801748 |
| *N. hurum* | MT939578 | *N. gangetica* | MF432958 | *N. gangetica* | HE801747 |
| *N. hurum* | MT939577 | *N. gangetica* | MF432957 | *N. gangetica* | HE801746 |
| *N. hurum* | MT939576 | *N. gangetica* | MF432956 | *N. gangetica* | HE801745 |
| *N. hurum* | MT939575 | *N. gangetica* | MF432955 | *N. gangetica* | HE801744 |
| *N. hurum* | MT939574 | *N. gangetica* | MF432954 | *N. gangetica* | HE801743 |
| *N. hurum* | MF432961 | *N. gangetica* | MF432953 | *N. gangetica* | HE801742 |
| *N. hurum* | MF432960 | *N. gangetica* | MF432953 | *N. gangetica* | AM495217 |
| *N. hurum* | AY259548 | *N. gangetica* | MF432952 | *N. gangetica* | AM495216 |
| *N. hurum* | HE801756 | *N. gangetica* | MF432950 | *N. gangetica* | AM495215 |
| *N. hurum* | HE801755 | *N. gangetica* | MF432949 | *N. gangetica* | AM495214 |
| *N. hurum* | HE801754 | *N. gangetica* | MF432948 | *N. gangetica* | AM495213 |
| *N. hurum* | HE801753 | *N. gangetica* | MF432947 | *N. gangetica* | AM495212 |
| *N. hurum* | HE801752 | *N. gangetica* | MF432946 | *N. gangetica* | AM495211 |
| *N. hurum* | JN232528 | *N. gangetica* | MF432945 | *N. gangetica* | AM495210 |
| *N. hurum* | AM495223 | *N. gangetica* | MF432944 | *N. gangetica* | AM495209 |
| *N. hurum* | AM495222 | *N. gangetica* | MF432943 | *N. gangetica* | AM495208 |
| *N. hurum* | AM495221 | *N. gangetica* | MF432942 | *N. formosa* | KT023012 |
| *N. hurum* | AM495220 | *N. gangetica* | MF432941 | *N. formosa* | AY259547 |
| *N. hurum* | AM495219 | *N. gangetica* | MF432940 | *N. formosa* | HE801741 |
| *N. hurum* | AM495218 | *N. gangetica* | MF432939 | *N. formosa* | HE801740 |
| *N. gangetica* | OP617704* | *N. gangetica* | MF432938 | *N. leithii* | AM495226 |
| *N. gangetica* | OP617703* | *N. gangetica* | MF136768 | *N. leithii* | AM495225 |
| *N. gangetica* | OP617702* | *N. gangetica* | AY259549 | *Nilssonia_sp.* | HE801762 |
| *N. gangetica* | OP617701* | *N. gangetica* | MT939572 | *Nilssonia_sp.* | HE801761 |

**Table S4.** Estimated inter-specific and intra-specific genetic distances among *Nilssonia* congeners based on the *COI* gene.

| **Species** | **Inter-species** | | | **Intra-species** |
| --- | --- | --- | --- | --- |
| *N. nigricans* |  |  |  | 0.3 |
| *N. hurum* | 4.1 |  |  | 0.2 |
| *N. formosa* | 9.0 | 7.4 |  | 0.2 |
| *N. gangetica* | 9.9 | 9.0 | 9.3 | 0.1 |

**Table S5.** Estimated inter-specific and intra-specific genetic distances among *Nilssonia* congeners based on the *Cytb* gene.

| **Species** | **Inter-species** | | | | **Intra-species** |
| --- | --- | --- | --- | --- | --- |
| *N. nigricans* |  |  |  |  | 0.5 |
| *N. hurum* | 5.2 |  |  |  | 0.4 |
| *N. gangetica* | 8.5 | 10.1 |  |  | 0.6 |
| *N. formosa* | 9.1 | 10.3 | 8.8 |  | 0.3 |
| *N. leithii* | 9.7 | 11.2 | 9.8 | 11.5 | 0 |

**Table S6.** Mean values and standard deviations of the spatial genetic surface for *N. nigricans* under present and projected future climate scenarios.

| **SCENARIO** | **MEAN** | **STD** |
| --- | --- | --- |
| Present | 0.290 | 0.175 |
| SSP245 (2041-2060) | 0.587 | 0.172 |
| SSP245 (2061-2080) | 0.638 | 0.163 |
| SSP585 (2041-2060) | 0.631 | 0.167 |
| SSP585 (2061-2080) | 0.682 | 0.143 |
